# Supplementary material for: Metal–organic framework–injectable hydrogel hybrid scaffolds promote accelerated angiogenesis for in vivo tissue engineering
Source: Royal Society of Chemistry journal article supplement (doi:10.1039/d5ra02770e), 2025-01-01
Supplement: d5ra02770e1.pdf [file d5ra02770e1.pdf]

Supplementary Information (SI) for RSC Advances.

This journal is © The Royal Society of Chemistry 2025

## Supporting Information for

# Metal–Organic Framework–Injectable Hydrogel Hybrid Scaffolds Promote Accelerated Angiogenesis for In Vivo Tissue Engineering

Sobuj Shahidul Islam, Tatsuya Dode, Soma Kawashima, Myu Fukuoka, Takaaki Tsuruoka,\*  
and Koji Nagahama\*

Department of Nanobiochemistry, Frontiers of Innovative Research in Science and  
Technology (FIRST), Konan University, 7-1-20 Minatojima-minamimachi, Chuo-ku, Kobe 650-  
0047, Japan.

\*Corresponding author.

K. Nagahama. Tel: +81-78-303-1328; E-mail: [nagahama@konan-u.ac.jp](mailto:nagahama@konan-u.ac.jp)

T. Tsuruoka. Tel: +81-78-303-1452; E-mail: [tsuruoka@konan-u.ac.jp](mailto:tsuruoka@konan-u.ac.jp)

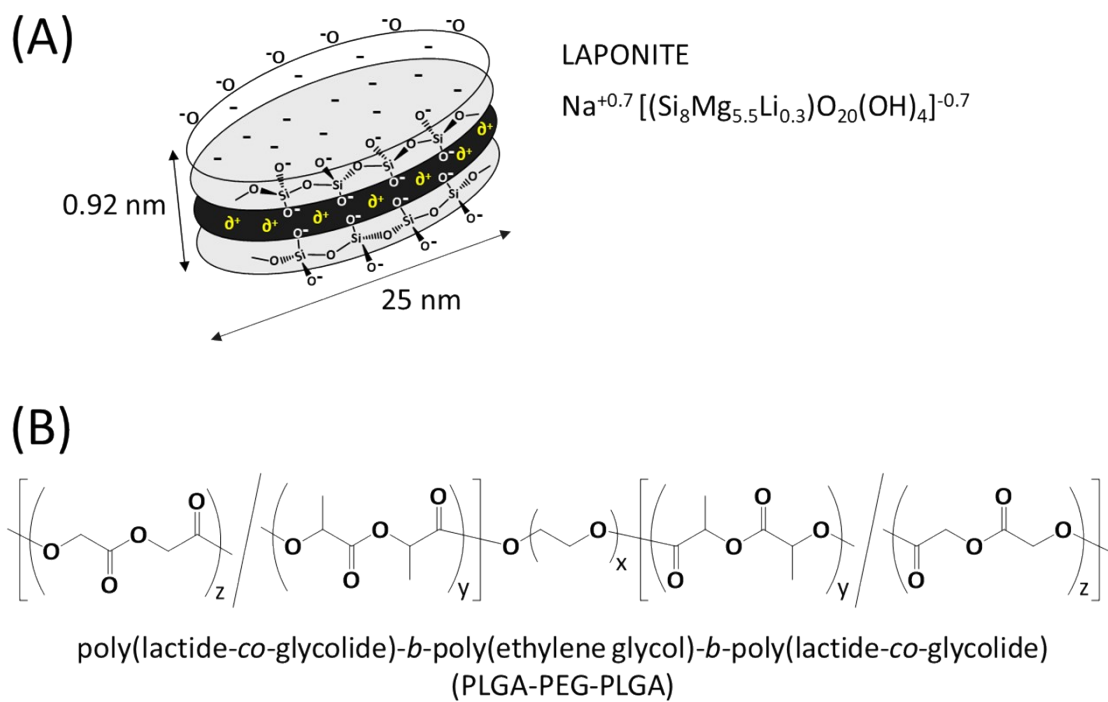

**Fig. S1.** Structures of (A) LAPONITE and (B) PLGA-PEG-PLGA copolymer.

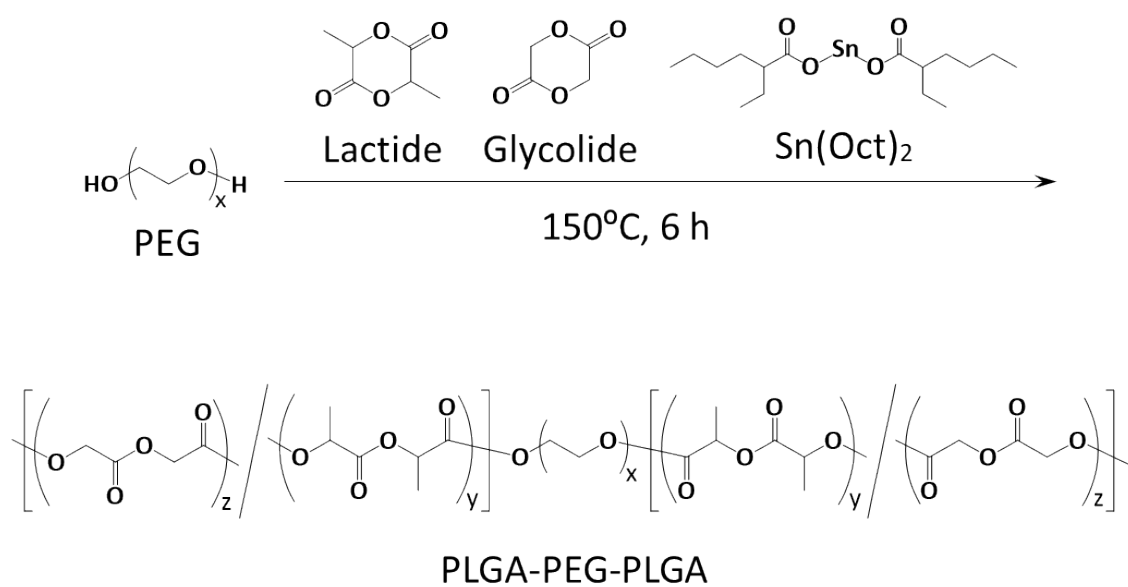

**Scheme S1.** Synthesis of PLGA-PEG-PLGA copolymer.

**Table S1.** Characterization of the synthesized PLGA-PEG-PLGA copolymers.

| DP of LA <sup>a</sup> | DP of GA <sup>a</sup> | $M_w$ of PEG | $M_w$ of copolymer <sup>b</sup> | $M_w/M_n$ <sup>c</sup> |
|-----------------------|-----------------------|--------------|---------------------------------|------------------------|
| 8                     | 4                     | 3,000        | 6,300                           | 1.27                   |

<sup>a</sup> Estimated by <sup>1</sup>H-NMR.

<sup>b</sup> Estimated by the following equation:  $M_w$  of copolymer =  $M_w$  of PEG segment +  $2 \times (M_w$  of PLGA segment).

<sup>c</sup> Estimated by GPC (eluent: DMSO, standard: PEG).

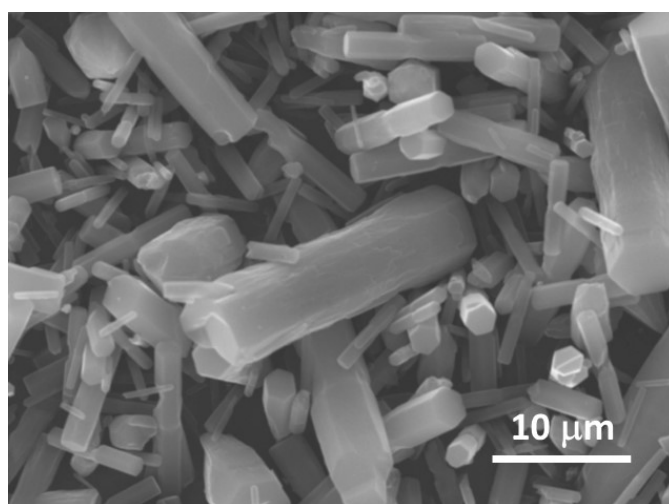

**Fig. S2.** SEM image of the synthesized NU-1000.

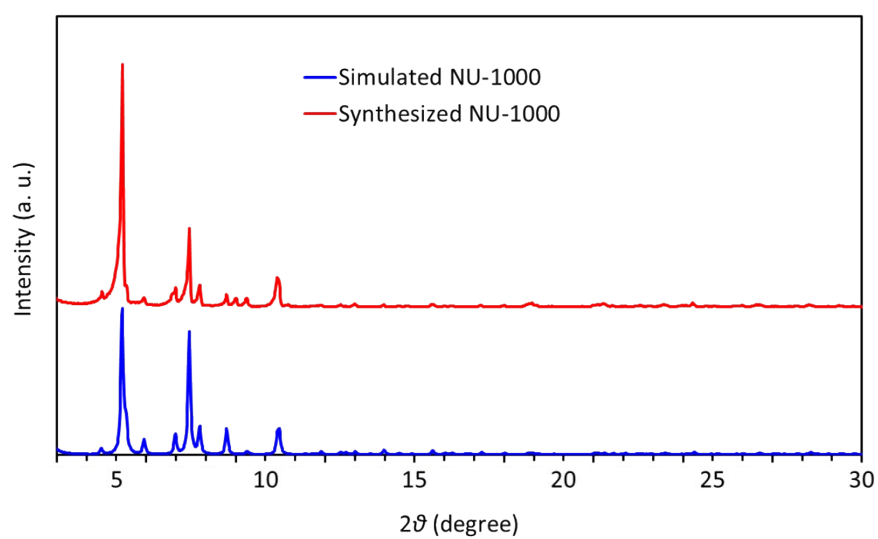

**Fig. S3.** Wide-angle X-ray diffraction pattern of the synthesized NU-1000.

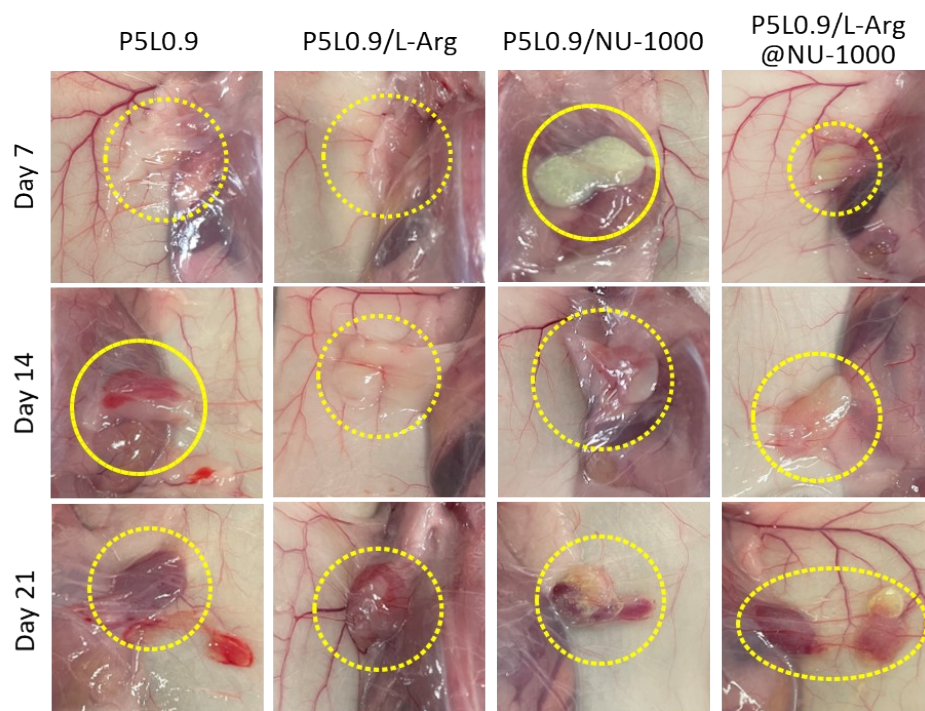

**Fig. S4.** Representative images of the hydrogels with surrounding tissue at 7, 14, and 21 days after administration of P5L0.9 hydrogels, L-arginine-loaded P5L0.9 hydrogels, NU-1000-composited P5L0.9 hydrogels, and L-arginine-loaded NU-1000-hybrid P5L0.9 hydrogels.

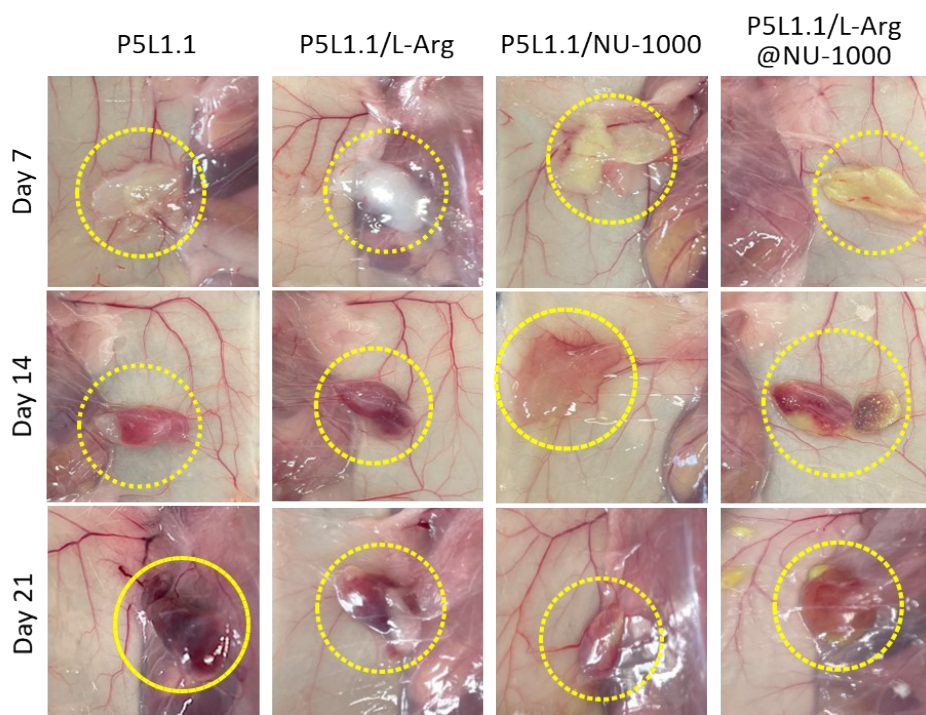

**Fig. S5.** Representative images of the hydrogels with surrounding tissue at 7, 14, and 21 days after administration of P5L1.1 hydrogels, L-arginine-loaded P5L1.1 hydrogels, NU-1000-composited P5L1.1 hydrogels, and L-arginine-loaded NU-1000-hybrid P5L1.1 hydrogels.



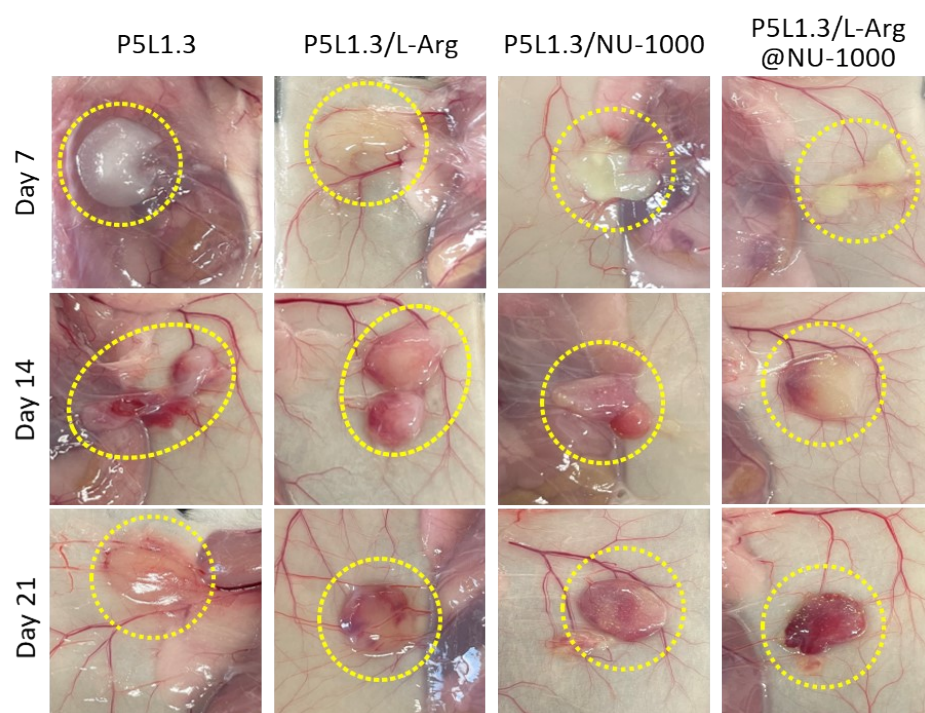

**Fig. S6.** Representative images of the hydrogels with surrounding tissue at 7, 14, and 21 days after administration of P5L1.3 hydrogels, L-arginine-loaded P5L1.3 hydrogels, NU-1000-composited P5L1.3 hydrogels, and L-arginine-loaded NU-1000-hybrid P5L1.3 hydrogels.

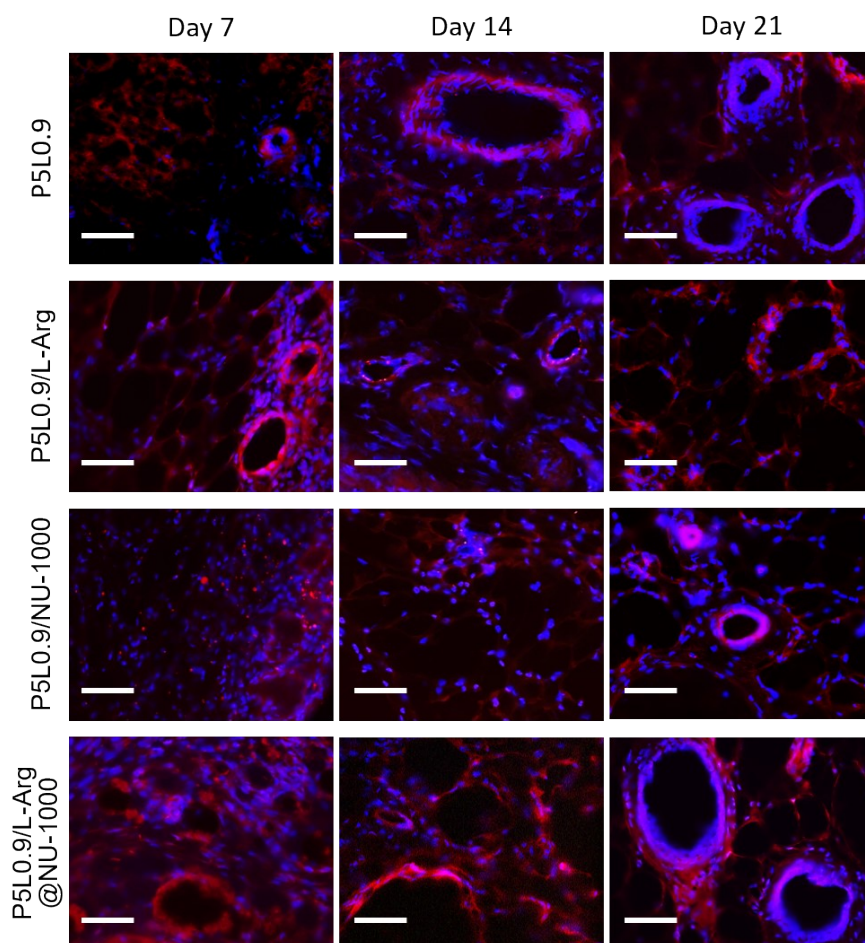

**Fig. S7.** Representative fluorescence microscopic images of the hydrogels formed in the subcutaneous tissue of mice. At days 7, 14, and 21 after administration of P5L0.9 hydrogels, L-arginine-loaded P5L0.9 hydrogels, NU-1000-composited P5L0.9 hydrogels, and L-arginine-loaded NU-1000-hybrid P5L0.9 hydrogels, these hydrogels were carefully removed from the mice and immunofluorescence staining for CD31 was performed. Blue: DAPI and red: CD31 (Alexa Fluor® 567).

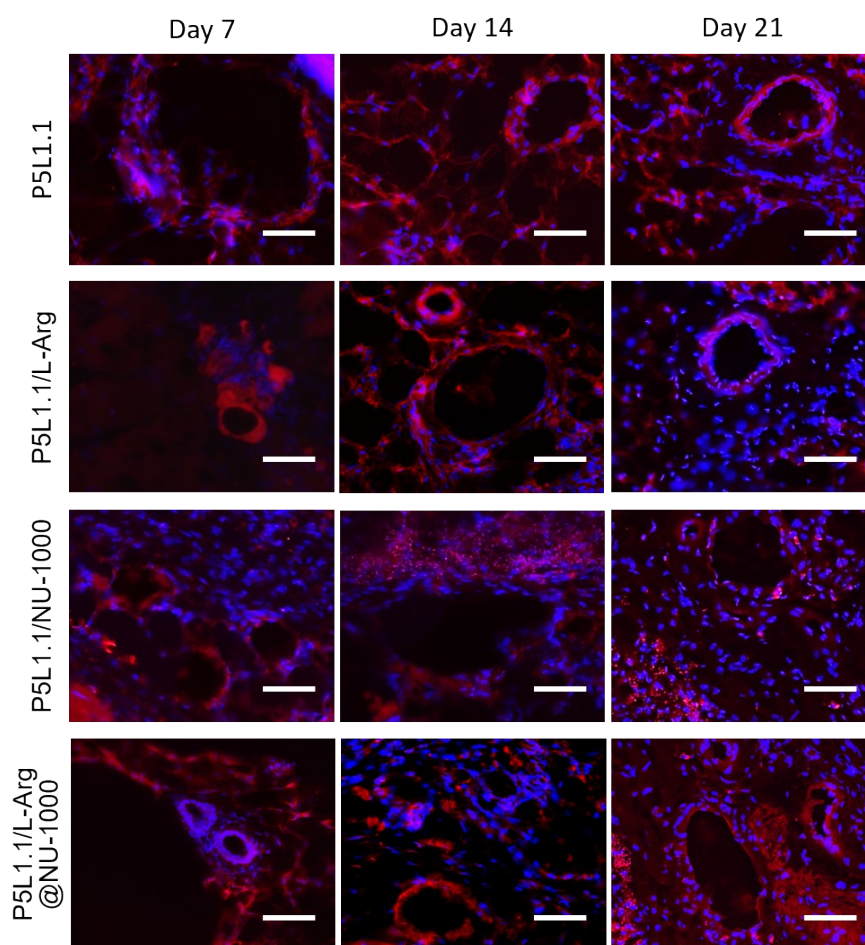

**Fig. S8.** Representative fluorescence microscopic images of the hydrogels formed in the subcutaneous tissue of mice. At days 7, 14, and 21 after administration of P5L1.1 hydrogels, L-arginine-loaded P5L1.1 hydrogels, NU-1000-composited P5L1.1 hydrogels, and L-arginine-loaded NU-1000-hybrid P5L1.1 hydrogels, these hydrogels were carefully removed from the mice and immunofluorescence staining for CD31 was performed. Blue: DAPI and red: CD31 (Alexa Fluor<sup>®</sup>567).

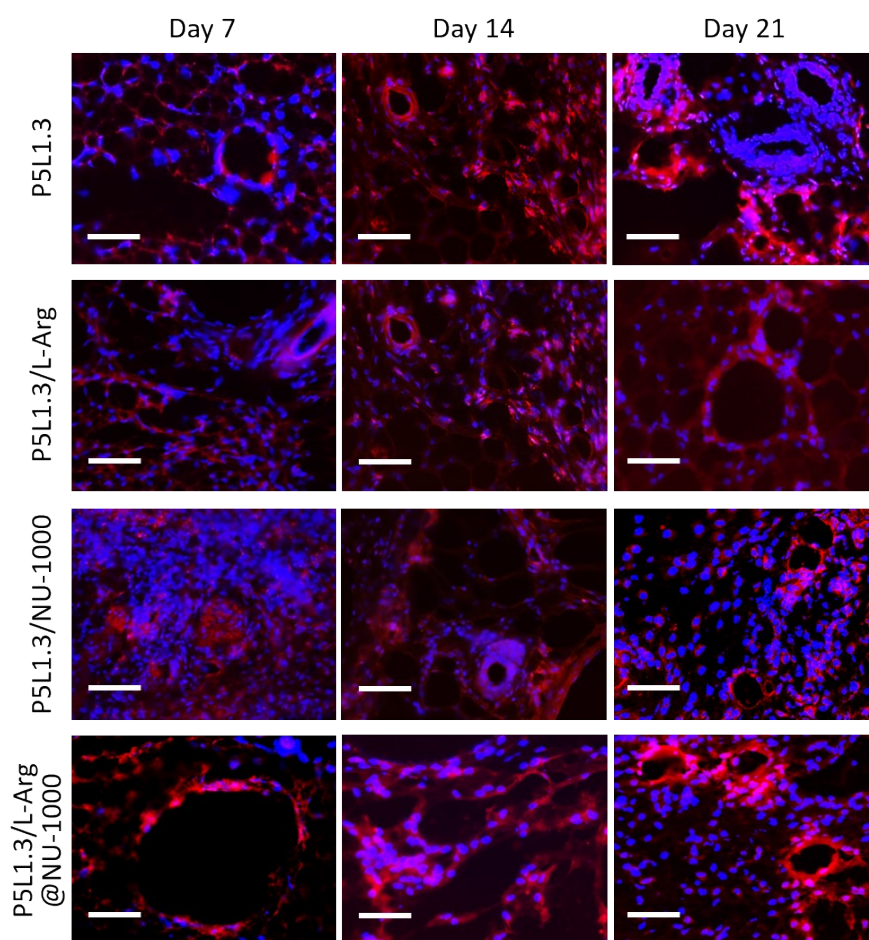

**Fig. S9.** Representative fluorescence microscopic images of the hydrogels formed in the subcutaneous tissue of mice. At days 7, 14, and 21 after administration of P5L1.3 hydrogels, L-arginine-loaded P5L1.3 hydrogels, NU-1000-composited P5L1.3 hydrogels, and L-arginine-loaded NU-1000-hybrid P5L1.3 hydrogels, these hydrogels were carefully removed from the mice and immunofluorescence staining for CD31 was performed. Blue: DAPI and red: CD31 (Alexa Fluor<sup>®</sup>567).
